# Supplementary material for: Trustworthiness appraisals of faces wearing a surgical mask during the Covid-19 pandemic in Germany: An experimental study
Source: PubMed Central journal article supplement (PMC8130962; doi:10.1371/journal.pone.0251393), 2021-05-18
Supplement: pone.0251393.s001.pdf [file pone.0251393.s001.pdf]

## S1 Table

*Sample description: Pandemic related cognitions, emotions and behaviours*

|                                               | Mean | SD*  |
|-----------------------------------------------|------|------|
| Evaluation of the protective potential of MNC |      |      |
| mean score                                    | 3.59 | 1.23 |
| Self-Protection                               | 2.81 | 1.45 |
| Protection of others                          | 4.38 | 1.39 |
| Burden through wearing an MNC                 |      |      |
| mean score                                    | 3.08 | 1.57 |
| Emotional burden                              | 2.93 | 1.85 |
| Physical burden                               | 3.22 | 1.62 |
| Compliance with safety behaviours             |      |      |
| mean score                                    | 4.42 | 1.00 |
| Wearing a MNC                                 | 5.28 | 1.26 |
| Hand washing                                  | 4.70 | 1.38 |
| Keeping distance of 1.5 m                     | 4.65 | 1.22 |
| Avoidance of public places                    | 3.59 | 1.44 |
| Avoiding unnecessary activities               | 3.70 | 1.63 |
| Avoiding private travelling                   | 4.57 | 1.69 |
| Risk assessment                               |      |      |
| mean score                                    | 3.83 | 1.10 |
| Risk for oneself                              | 3.03 | 1.35 |
| Risk for close others                         | 3.88 | 1.34 |
| Risk for Germany                              | 3.73 | 1.26 |
| Risk for the World                            | 4.65 | 1.28 |

*Note.* \*standard deviation.
