# Supplementary material for: Trustworthiness appraisals of faces wearing a surgical mask during the Covid-19 pandemic in Germany: An experimental study
Source: PubMed Central journal article supplement (PMC8130962; doi:10.1371/journal.pone.0251393), 2021-05-18
Supplement: pone.0251393.s002.pdf [file pone.0251393.s002.pdf]

## S2 Table

*Spearman-Correlation coefficients between pandemic related measures*

|                          | 1       | 2       | 3      | 4     | 5 |
|--------------------------|---------|---------|--------|-------|---|
| 1 Protection MNC         | -       |         |        |       |   |
| 2 Burden MNC             | -.336** | -       |        |       |   |
| 3 Compliance             | .317**  | -.297** | -      |       |   |
| 4 Risk Pandemic          | .529**  | -.376** | .566** | -     |   |
| 5 Psychological Distress | -.102   | .359**  | -.065  | -.133 | - |

*Note.* \*\* $p < 0.01$

The evaluation of a protective effect of MNCs was significant positively related to the experienced risk of the pandemic and higher compliance with behaviours suited to reduce the spreading of the pandemic. In contrast, a higher perceived burden through wearing MNCs was related to a lower experienced risk of the pandemic and lower pandemic related compliance behaviours. Higher psychological distress was only related to a higher experienced burden through wearing MNCs.
